# Supplementary material
Source: publisher figshare collection journal article supplement (https://gsajournals.figshare.com/articles/dataset/_/14732073)

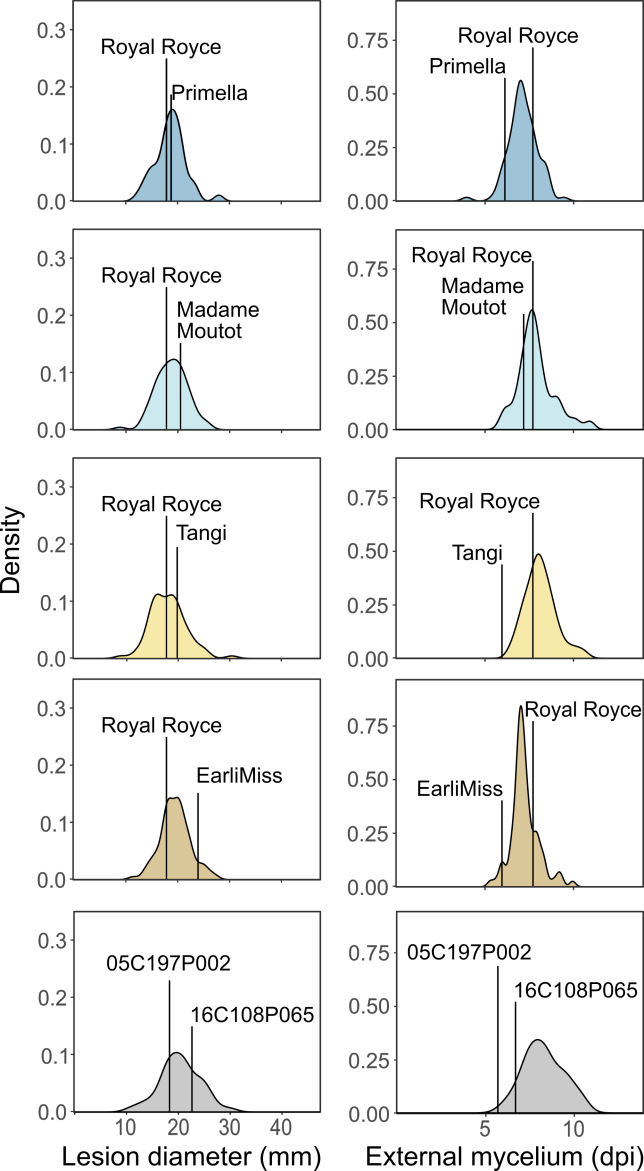

Supplement: Supplementary file 1 [file 1]

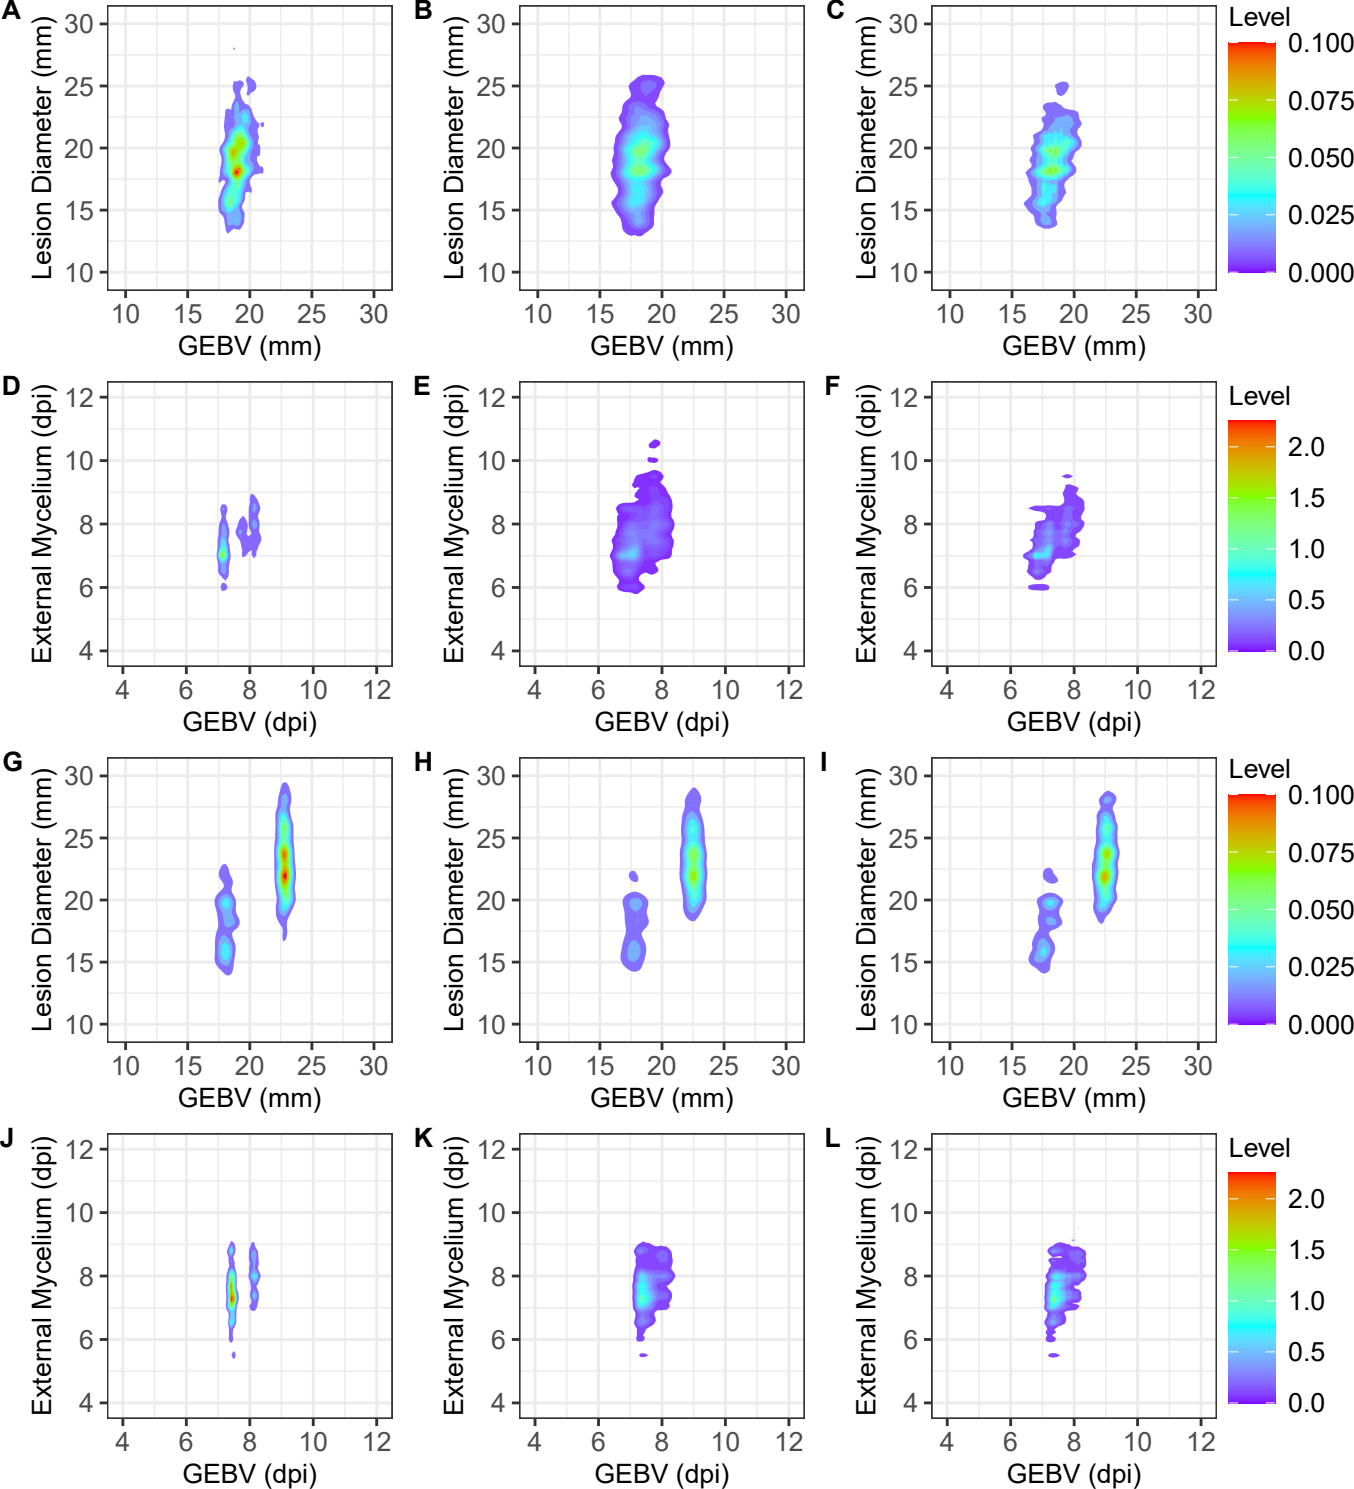

Supplement: Supplementary file 2 [file 1]

UCD Finn

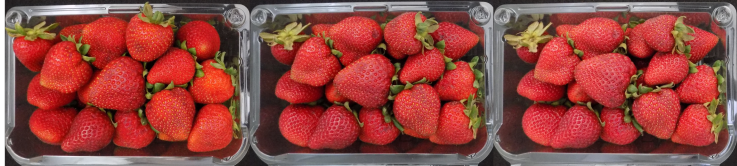

UCD Mojo

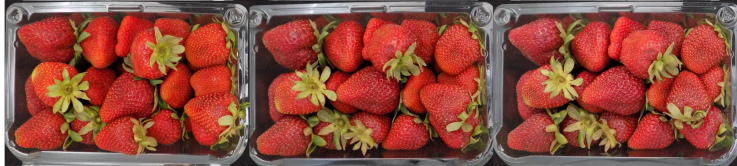

Portola

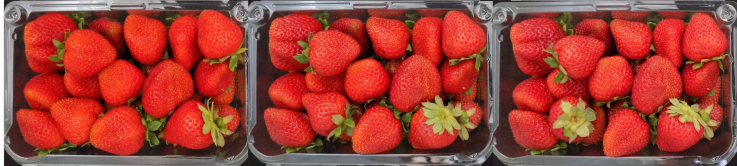

0

7

14

Days Post-Harvest

Supplement: Supplementary file 3 [file 1]
